# 1 Traditional Ecological Knowledge and non-food uses of stingless bee 2 honey in Kenya's last pocket of tropical rainforest

3

4 Authors: Madeleine Héger<sup>1\*</sup>, Pierre Noiset<sup>1</sup>, Kiatoko Nkoba<sup>2</sup> & Nicolas J. Vereecken<sup>1\*</sup>

5

6 <sup>1</sup> Agroecology Lab, Université libre de Bruxelles (ULB), Boulevard du Triomphe CP 264/02, B-1050 Brussels, Belgium;

7 <sup>2</sup> International Centre of Insect Physiology and Ecology (*icipe*), P.O. Box 30772-00100, Nairobi, Kenya

8 \* for correspondence: [madeleine.heger@ulb.be](mailto:madeleine.heger@ulb.be) and [nicolas.vereecken@ulb.be](mailto:nicolas.vereecken@ulb.be)

## 9 Abstract

10 *Ethnopharmacological relevance:* Stingless bee honey is a natural remedy and therapeutic agent traditionally  
11 used by indigenous communities across the (sub-)Tropics. Despite the potential of forest honey, a prime non-  
12 timber forest product (NTFP), to revitalize indigenous foodways and to generate income in rural areas, reports  
13 on Traditional Ecological Knowledge involving stingless bees and their honey are lacking in Sub-Saharan Africa.

14 *Aim of the study:* Our aim was to explore, understand and document the non-food uses of stingless bee honey  
15 and associated empirical knowledge in Kenya's only tropical rainforest at Kakamega.

16 *Materials and Methods:* We used ethnographic techniques and methods, including semi-structured  
17 questionnaires and recording devices.

18 *Results:* People in Kakamega were able to discriminate between six different stingless bee species and  
19 provided an account on species-specific uses of honeys. Collectively, we identified 26 different uses.

20 *Conclusion:* Stingless bee honey is essential in traditional (folk) medicine, but also in the cultural and spiritual  
21 life of indigenous communities in Kakamega.

22

23 **Keywords:** Indigenous Knowledge, Meliponini, Kakamega Forest, Traditional medicine

## 24 1. Introduction

25 Indigenous foodways are the result of thousands of years of adaptation, resilience, and interactivity/reciprocity  
26 with Nature (Engel, 2010). Worldwide, indigenous communities have gained an intimate knowledge of their  
27 environment as a source of wooden material, edible and medicinal plants, animals, and their derived products.  
28 This traditional ecological knowledge (TEK) has been orally passed across generations and bears witness to the  
29 biological and cultural diversity of our planet (Fernández-Llamazares et al., 2021). However, the world is facing  
30 a rapid erosion of this valuable intangible cultural heritage, due to decades of colonialism, agricultural  
31 intensification and shifting of land uses causing deforestation among other forms of anthropogenic  
32 environmental disturbance in a context of food system globalization. This multi-faceted phenomenon contributed  
33 to the destruction of indigenous communities, obliterating their cultural identities, and leading to the  
34 disappearance of TEK, including indigenous medical knowledge (Rosales, 2013).

35 Worldwide, natural remedies from insects and their derived products have long been used in traditional  
36 medicine (Costa-Neto, 2005). Honey produced by the iconic Western Honey Bee, *Apis mellifera*, is one of these  
37 natural substances and has been gathered in Nature since ancient times (Vit et al., 2013) for its medicinal and  
38 nutritional properties. Interestingly, there is another group of fascinating honey producing social bees, called  
39 stingless bees (Hymenoptera: Apidae: Meliponini), particularly associated with indigenous forest habitats and  
40 found in the (sub-)tropical regions of the world (Michener, 2007). Growing evidence shows that health benefits  
41 such as anti-inflammatory, anti-viral/fungal, anticancer, and antioxidant properties (etc.) of stingless bee honey  
42 (SBH) are well known by indigenous communities (Pimentel et al., 2022), and that SBH also bears a particularly  
43 significant importance in social habits and beliefs (Ayala et al., 2013). Until now, traditional uses and knowledge  
44 of SBH have been well documented in Australia, South and Central America, but little is known about the  
45 traditional knowledge in regions of the African continent. In this research, we aim to contribute to the  
46 understanding and documentation of TEK relative to the non-food uses of stingless bee honey in Kenya's last  
47 pocket of tropical rainforest located in Kakamega county, Western Kenya.

## 48 2. Material and methods

49

**a. Study area**

50 The research took place in Kakamega Forest reserve (0°09'N, 34°50'E) in Western Kenya. It is the only  
 51 surviving tropical rainforest in the country and remnant of the rainforests of the Democratic Republic of the  
 52 Congo and West Africa (Nkoba et al., 2012). The forest is home to a biodiversity of fauna and flora (Wass,  
 53 1995), and is a major nesting habitat for stingless bees (SB). People in the area highly rely on the forest and its  
 54 non-timber forest products (NTFPs). Meliponiculture (i.e., beekeeping with stingless bees) is well developed in  
 55 the area and contributes in improving the livelihoods of local communities while conserving nature (Macharia,  
 56 2008; Nkoba et al., 2012).

57

**b. Surveys**

58 The study was conducted in March-April 2022 with questionnaire surveys and in-depth interviews. The survey  
 59 was divided into four sections: (1) personal information of meliponiculturists (i.e., stingless bee beekeepers), (2)  
 60 local knowledge on SB, (3) local knowledge and uses of SBH, (4) personal experience with meliponiculture.  
 61 Details on these four sections and what they entail are provided in Appendix A. Interviews were recorded with  
 62 the prior permission of the interviewees and following ethical standards. In total, we performed 36 interviews  
 63 with meliponiculturists and SBH hunters from a lively pre-existing network established by our research partners  
 64 at the International Center of Insect Physiology and Ecology (*icipe*, Nairobi, Kenya). Interviews were performed  
 65 while visiting the meliponiculturist's colonies, which allowed the collection of voucher specimens of stingless  
 66 bees and samples of honey. The identity of the bees based on local knowledge was provided by the  
 67 interviewees.

68

**3. Results**

69 Our results indicate that SBH is associated by the local communities with key health benefits, and we provide  
 70 evidence that SBH forms an integral part in the local TEK. We recorded 26 different uses, mostly medicinal but  
 71 also traditional and spiritual (Figure 1). There are also species-specific uses, for e.g. honey from *Meliponula*  
 72 *ferruginea* is well known to be an aphrodisiac, and honey from *Meliponula lendliana* plays an essential role in  
 73 circumcision ceremonies, both in the spiritual and hygienic part of the ceremony.

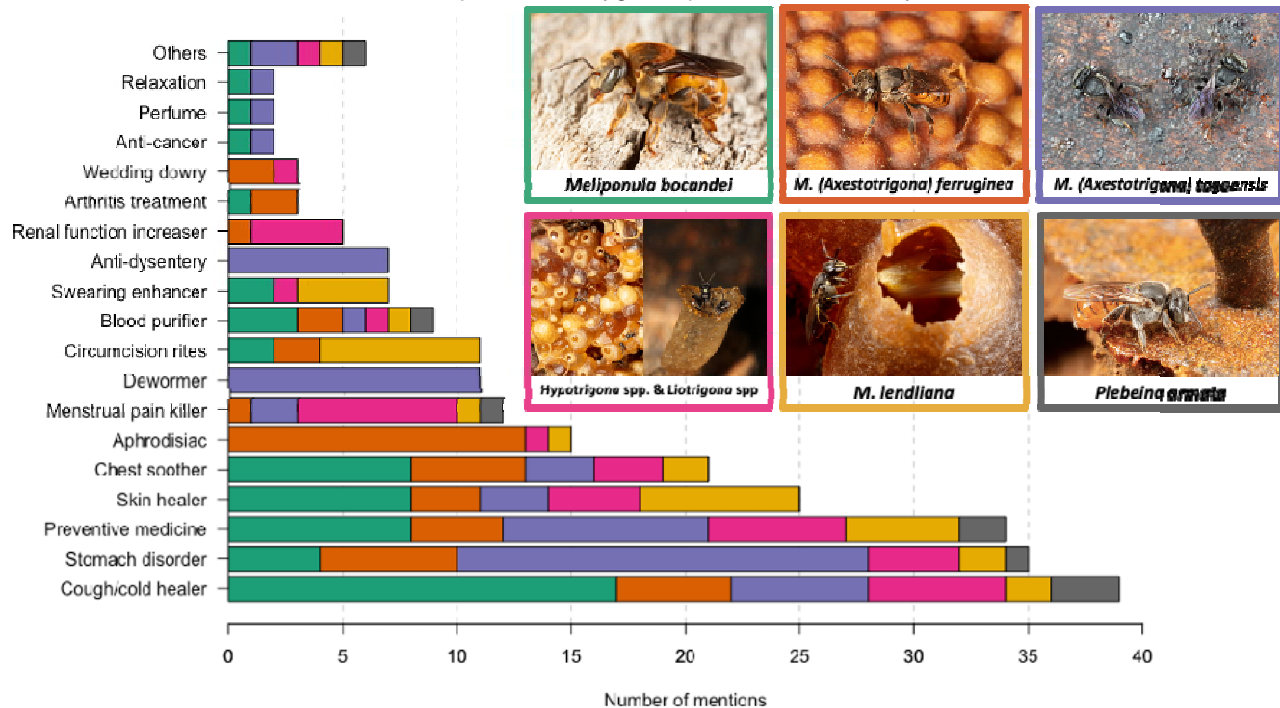

75 Figure 1. Non-food use attributed in regard to the different SB species. Details of the uses: “stomach disorder”  
 76 includes stomach pain, ulcers, and gastritis; “cough/colds” includes sore throat, throat infections and flu; “chest  
 77 soother” also include decongestant that soothe the chest and airways; “swearing enhancer” also refers to  
 78 commit oneself, improve vow/ oath; “skin healer” includes wounds, scars, burns, cuts and any kind of skin  
 79 ailments healer. When used in circumcision rites, honey is applied on the wounds and is also taken by everyone

80 as a sign of purity, because it is a sacred natural product. “Others” include hair growth promoter, fertility  
 81 enhancer, urinary problem healer, to prepare brew, to protect the house from bad spirits and as an appetizer.  
 82 Bees pictures © NJ Vereecken.

83 Knowledge on the uses of SBH by the local communities in Kakamega is ancestral and is shared orally and  
 84 informally across generations, through experiential learning and observation. Local names of the different SB  
 85 species provide information regarding morphological traits of the bees, their nesting habits and even  
 86 characteristics of the honey they produce (Table 1).

87 Table 1: names and literal meaning of SB species found in Kakamega in the local language (Luhya)

| Scientific Name                                           | Local Name(s)                                            | Literal Meaning                                                     |
|-----------------------------------------------------------|----------------------------------------------------------|---------------------------------------------------------------------|
| <i>Meliponula (Meliponula) bocandei</i><br>(Spinola 1853) | Igora                                                    | Igora = lost: “getting lost” ; “a lost sweetness in the forest”     |
| <i>M. (Axestotrigona) ferruginea</i><br>(Lepeletier 1841) | Inasesa (Tiriki community)<br>Inasasa (Isukha community) | Msaza = man : “men energy” ; “sweet” ; “found in trees”             |
| <i>M. (Axestotrigona) togoensis</i><br>(Stadelmann 1895)  | Iwera (Tiriki community)<br>Iwere (Isukha community)     | “ medicine”; “clears the stomach”; “not easy to find”               |
| <i>Hypotrigona</i> spp. Cockerell 1934                    | Vuyiyi                                                   | “aggressive”; “stupid”; “small”; “ found in the walls of the house” |
| <i>Liotrigona</i> Moure 1961                              | Vuyiyi (Tiriki community)<br>Chihiyi (Isukha community)  | Those two words refer to the sound they make “iiiiii”               |
| <i>Meliponula (Meliplebeia) lendliana</i> (Friese 1900)   | Indakala                                                 | “found in the ground”                                               |
| <i>Plebeina armata</i> (Magretti 1895)                    | Vusitsi                                                  | Vusitsi = “wild banana” (plantain)                                  |

88

89 The three main reasons why people keep SB in Kakamega are for 1) medicine provision (79%), 2) income  
 90 generation (74%), 3) food provision (74%). The most domesticated species are *M. ferruginea* and *M. togoensis*.  
 91 According to the participants, they are easy to find in the wild, easy to manage in man-made wooden colonies,  
 92 and they produce high yields of honey.

#### 93 4. Discussion and conclusions

94 In the last decades, pressures from food system globalization and shifts in land uses have contributed to  
 95 erasing the cultural identities of indigenous communities, endangering their traditional knowledge (FAO, 2021).  
 96 The objective of this study was to fill the gap of TEK associated with Afrotropical SB by documenting the non-  
 97 food uses of SBH in the western region of Kenya. In line with what has already been documented in other  
 98 regions of the world (Abd Jalil et al., 2017; Reyes-González et al., 2014; Vit et al., 2015), we report that there is  
 99 a multitude of uses of the honeys from the different SB species. This indicates that indigenous knowledge and  
 100 traditions are likely to vary across regions and perhaps continents. In Kakamega local communities, SBH is a  
 101 very popular therapeutic agent that also plays an essential role in the cultural, traditional, and spiritual lives of  
 102 local people.

103 Meliponiculture offers the potential to sustain livelihoods, to secure food and medicine provisions, to revitalize  
 104 indigenous foodways and to safeguard indigenous knowledge base in African tropical forests while promoting  
 105 sustainable use of natural resources. Preserving SB is also the preservation of traditions and cultural habits  
 106 related to them, which is part of the capital of humanity (Ayala et al., 2013). Beyond the hitherto little explored  
 107 natural compositional variation of SBH (e.g. Mokaya et al. 2022; Noiset et al. 2022; Nordin et al. 2018), many  
 108 other drivers can explain the depth and persistence of TEK, including the variation in ethnicities, environmental  
 109 conditions and degradation, but also the contrasts in regional political history and domination. More fine-grained  
 110 field surveys and analyses using state-of-the art laboratory techniques should be performed across the  
 111 Afrotropics to fully document TEK associated with SBH, their variation and their socio-environmental drivers and  
 112 the extent of their co-variation with the patterns of bioactive compounds detected in these highly praised  
 113 honeys.

## 114 Acknowledgments

115 This study was supported by the Fonds National de la Recherche Scientifique (F.R.S-FNRS) through a “Projet  
116 de Recherches” (PDR) project to NJV. We also acknowledge the support by *icipé* through which this field survey  
117 was conducted. Our acknowledgment also goes to *icipé* core donors and the government of Kenya. We also  
118 want to thank the field technicians and all the meliponiculturists, farmers and hunters for sharing their  
119 knowledge with us.

## 120 Author contributions

121 Conceptualisation: N.J.V., K.N. and P.N., Methodology: N.J.V., P.N., M.H., Writing—Original draft: M.H., P.N.  
122 Writing—Review and editing: N.J.V., K.N., Data Curation: M.H., Investigation: M.H., Validation: M.H., K.N.,  
123 Visualization: M.H., P.N. & N.J.V., Supervision and Administration: N.J.V., K.N. Funding acquisition : N.J.V.

## 124 References

- 125 Abd Jalil, M.A., Kasmuri, A.R., Hadi, H., 2017. Stingless Bee Honey, the Natural Wound Healer: A Review. *Skin Pharmacol*  
126 *Physiol* 30, 66–75. <https://doi.org/10.1159/000458416>
- 127 Ayala, R., Gonzalez, V.H., Engel, M.S., 2013. Mexican Stingless Bees (Hymenoptera: Apidae): Diversity, Distribution, and  
128 Indigenous Knowledge, in: Vit, P., Pedro, S.R.M., Roubik, D. (Eds.), *Pot-Honey*. Springer New York, New York, NY, pp.  
129 135–152. [https://doi.org/10.1007/978-1-4614-4960-7\\_9](https://doi.org/10.1007/978-1-4614-4960-7_9)
- 130 Costa-Neto, E.M., 2005. Entomotherapy, or the Medicinal Use of Insects. *Journal of Ethnobiology* 25, 93–114.  
131 [https://doi.org/10.2993/0278-0771\(2005\)25\[93:EOTMUO\]2.0.CO;2](https://doi.org/10.2993/0278-0771(2005)25[93:EOTMUO]2.0.CO;2)
- 132 Engel, K., 2010. *The Elusive promise of Indigenous Development: Rights, Culture, Strategy*, Issue 3. Duke University Press,  
133 Durham.
- 134 Fernández-Llamazares, Á., Lepofsky, D., Lertzman, K., Armstrong, C., Brondízio, E., Gavin, M., Lyver, P., Nicholas, G.,  
135 Pascua, P., Reo, N., Reyes-García, V., Turner, N., Yletyinen, J., Anderson, E., Balee, W., Cario, J., David-Chavez, D.,  
136 Dunn, C., Garnett, S., Vaughan, M., 2021. Scientists' Warning to Humanity on Threats to Indigenous and Local  
137 Knowledge Systems. *Journal of Ethnobiology* 41, 144–169. <https://doi.org/10.2993/0278-0771-41.2.144>
- 138 Indigenous Peoples' food systems, 2021. . FAO, Alliance of Bioversity International, and CIAT.  
139 <https://doi.org/10.4060/cb5131en>
- 140 Macharia, J.K., 2008. Status and the potential of stingless bees (apidae: meliponinae) for forest conservation and income  
141 generation: a case study of kakamega forest. College of Pure Science (COPAS).
- 142 Michener, C.D., 2007. *The bees of the world*, 2nd ed. ed. Johns Hopkins University Press, Baltimore.
- 143 Mokaya, H.O., Nkoba, K., Ndunda, R.M., Vereecken, N.J., 2022. Characterization of honeys produced by sympatric species  
144 of Afrotropical stingless bees (Hymenoptera, Meliponini). *Food Chemistry* 366, 130597.  
145 <https://doi.org/10.1016/j.foodchem.2021.130597>
- 146 Nkoba, K., Raina, S.K., Muli, E., Mithöfer, K., Mueke, J., 2012. Species richness and nest dispersion of some tropical  
147 meliponine bees (Apidae: Meliponinae) in six habitat types in the Kakamega forest, western Kenya. *International*  
148 *Journal of Tropical Insect Science* 32, 194–202. <https://doi.org/10.1017/S1742758412000355>
- 149 Noiset, P., Cabirol, N., Rojas-Oropeza, M., Warrit, N., Nkoba, K., Vereecken, N.J., 2022. Honey compositional convergence  
150 and the parallel domestication of social bees. *Sci Rep* 12, 18280. <https://doi.org/10.1038/s41598-022-23310-w>
- 151 Nordin, A., Sainik, N.Q.A.V., Chowdhury, S.R., Saim, A.B., Idrus, R.B.H., 2018. Physicochemical properties of stingless bee  
152 honey from around the globe: A comprehensive review. *Journal of Food Composition and Analysis* 73, 91–102.  
153 <https://doi.org/10.1016/j.jfca.2018.06.002>
- 154 Pimentel, T.C., Rosset, M., Sousa, J.M.B., Oliveira, L.I.G., Mafaldo, I.M., Pintado, M.M.E., Souza, E.L., Magnani, M., 2022.  
155 Stingless bee honey: An overview of health benefits and main market challenges. *Journal of Food Biochemistry* 46.  
156 <https://doi.org/10.1111/jfbc.13883>
- 157 Reyes-González, A., Camou-Guerrero, A., Reyes-Salas, O., Argueta, A., Casas, A., 2014. Diversity, local knowledge and  
158 use of stingless bees (Apidae: Meliponini) in the municipality of Nocupétaro, Michoacan, Mexico. *J Ethnobiology*  
159 *Ethnomedicine* 10, 47. <https://doi.org/10.1186/1746-4269-10-47>
- 160 Rosales, G.R.O., 2013. Medicinal Uses of Melipona beecheii Honey, by the Ancient Maya, in: Vit, P., Pedro, S.R.M., Roubik,  
161 D. (Eds.), *Pot-Honey*. Springer New York, New York, NY, pp. 229–240. [https://doi.org/10.1007/978-1-4614-4960-7\\_15](https://doi.org/10.1007/978-1-4614-4960-7_15)
- 162 Vit, P., Pedro, S.R.M., Roubik, D. (Eds.), 2013. *Pot-Honey: A legacy of stingless bees*. Springer New York, New York, NY.  
163 <https://doi.org/10.1007/978-1-4614-4960-7>
- 164 Vit, P., Vargas, O., Lpez, T., Valle, F., 2015. Meliponini biodiversity and medicinal uses of pot-honey from El Oro province in  
165 Ecuador. *Emir. J. Food Agric* 27, 502. <https://doi.org/10.9755/ejfa.2015.04.079>
- 166 Wass, P., 1995. Kenya's indigenous forests: status, management and conservation.

## 168 **Appendix A: supplementary Material & Methods: Questionnaire**

### 169 **1) Personal information**

- 170 - Name; Age; Gender
- 171 - Address: county, village, GPS coordinates
- 172 - Academic level
- 173 - Occupation
- 174 - Phone number
- 175 - Household size + Position
- 176 - Tribe/ Community

### 177 **2) Traditional Ecological Knowledge on stingless bees**

- 178 - Do you know stingless bees?
  - 179 o Which ones?
  - 180 o Local taxonomy (how you differentiate each species)
  - 181 o Name in local language meaning
- 182 - Which species are mostly found in your area?
- 183 - Which species do you domesticate? Why?
- 184 - Are stingless bees important to you? Why?

### 185 **3) Local knowledge and non-food uses of stingless bee honey**

- 186 - Do you use stingless bee honey? For what? How? Taste characteristics?
- 187 - Where do you obtain these hive products from?
- 188 - When is the honey used? Special occasion? Daily?
- 189 - What role (value) do stingless bee honey play in your culture? Beliefs?
- 190 - Do you use other products of the hive? For what? How?
- 191 - Where did you get knowledge from? Who did you transfer this knowledge to?
- 192 - Have you ever heard of any other possible uses of stingless bee's honey?

### 193 **4) Personal experience with stingless beekeeping**

- 194 - Since how long have you practiced meliponiculture?
- 195 - Have you been trained on modern stingless beekeeping? If yes, by who?
- 196 - What are your motivating factors to do stingless beekeeping:
- 197 - How many stingless bee hives do you have in total?
- 198 - In which type of structure do you house the stingless?
- 199 - Where do you keep colonies that you domesticate?
- 200 - How do you obtain your starter colonies?
  - 201 o If baiting swarms, what method do you use?
- 202 - What are the natural enemies and pests affecting your colonies?
- 203 - Are you facing any challenges in keeping stingless bees?
- 204 - Quantities of honey harvested per hive per species? After how many months?
- 205 - How do you conserve (storage) harvested hive products?
- 206 - Do you sell the products? If yes, how much
- 207 - Where are the products sold? Locally or out of Kakamega ?
- 208 - Who are your clients?
- 209 - How do you advertise your products? Online, mouth to mouth, radio, TV...

210

211
